# Supplementary material
Source: publisher site journal article supplement (https://www.dovepress.com/article/267077)
Supplement: Supplementary file 1 [file get_supplementary_file.php]

**Figure S1. Flow cytometry assessment of relative affinity and specificity of yeast-displayed antibodies for purified antigen F1V**. (**A**) Flow cytometry dot plots obtained for yeast displaying single chain antibodies (scFv) aF1sc 2 and 8 along with negative control Z3 (anti influenza M2) are shown. Biotinylated F1V binding was detected using Alexa 633-labelled streptavidin, and measured by the intensity of APC fluorescence (y-axis). Level of display was detected using a phycoerythrin (PE)-labelled antibody recognizing the SV5 tag (co-expressed with every scFv), and measured by PE fluorescence (x-axis). (**B**) F1V binding (mean APC fluorescence) by the full set of yeast-displayed scFvs is shown. The blue bars represent the mean APC fluorescence calculated from a sample size of 10,000 yeast cells (blue dots in Q2 and Q4 in **A**), and normalized for level of scFv expression (mean PE fluorescence). All antibodies, except for aF1sc 6 and negative control Z3, bound F1V and did not cross react with the negative control antigen myoglobin (orange bars). The gray bars indicate background signal detected in the absence of antigen.

**Figure S2. ELISA assessment of relative affinity and specificity of anti-F1 IgGs for purified antigen F1V**. Binding of various anti-F1 IgGs to biotinylated F1V (blue bars) and biotinylated myoglobin (negative control, orange bars) was detected by using anti-human HRP and measured by the amount of HRP product (based on absorbance at 450 nm). The data presented are averages of three experiments with correspondent standard deviations. Natural human IgG1 was used as negative control antibody. Antibody scFv 7 was not converted to IgG; hence it is not included in this assay.

**Figure S3. Determination of antibody affinity by whole cell ELISA.** Fixed *Y. pestis* cells were immobilized on Nunc Maxisorp ELISA plates (104 on average counted before antibody binding) and used as “antigens”. The antibody binding to cells (AB, as revealed by Abs450) and the corresponding antibody concentration ([A]) were fit to this equation: AB = ABmax*[A]/(KD + [A]), using Kaleidagraph version 4.5.4. The calculated functional affinities (KDs)and the corresponding errors are indicated in the insets. (**A**) All unconjugated F1Igs, including the commercial mouse F1 IgG1 YPF19, were analyzed, as well as (**B**) F1Ig 2 and F1Ig 8 conjugated with diethylenetriamine pentaacetic acid (F1Ig 2-DTPA and F1Ig 8-DTPA respectively). Each data point is an average of three experiments with corresponding standard deviation.

**Figure S4. Flow cytometry analyses supports that F1Ig 2 and F1Ig 8 target two different epitopes of F1 antigen.**  (**A**) *Y. pestis* pre-saturated with F1Ig 8-APC do not lose their fluorescence (same within error, green bars) upon treatment with various concentrations of F1Ig 2-PE (red bars), including saturating concentration (right most red bar). (**B**) *Y. pestis* pre-saturated with unlabeled F1Ig 8 (red dots) or not pre-saturated (blue squares) bind to F1Ig 2-PE with same affinity (within error). The maximum amount of antibody binding is reduced, probably due to the steric clash of the bulky PE in F1Ig 2-PE, with F1Ig 8.

**Figure S5. Detection of F1 antigen by lateral flow assay.** Various concentrations of monomer-enriched F1V antigen were detected by LFA using F1Ig 8 as the capturing antibody, and F1Ig 2-colloidal gold conjugate as the detecting antibody. The fact that the antibody pair enabled detection of even 5 ng of antigen, suggests that F1Ig 8 and F1Ig 2 recognize two different epitopes of F1. **1** = 10 ng F1; **2** = 7 ng F1; **3** = 5 ng F1.

**Figure S6. Determination antibody activity for stability studies.** (**A**)Antibodies dissolved in preservation buffer were tested for antibody binding by whole cell ELISA before the start of incubation at 37°C (*Y. pestis* bound HRP activity at various F1Ig concentrations (blue and orange circles). For both F1Ig 2 (left) and F1Ig 8 (right) a linear increment of antibody binding activity was obtained in the 0.11-0.44 nM antibody concentration range (orange circles). (**B**) Antibody aliquots stored at 37°C for a period of four weeks, and removed from incubation at one-week intervals, were tested for cell binding within the linear range of concentrations determined in **A**, in triplicate (blue, orange and gray circles) or duplicate (F1Ig 8 week 2 and 3). The plots were linear in every case, the slopes were averaged and standard deviations calculated to obtain the data in Figure 3.

**Figure S7. Effect of IgGs on *Y. pesti*s’ growth** (**A**) *Y. pestis* cell density (Abs600) was monitored for more than 19 hours in the absence (grey diamond) or the presence of either (left) F1Ig 2 (at 350 nM, red squares and 90 nM, maroon squares), (right) F1Ig 8 (at 350 nM, blue squares, and 90 nM, turquoise triangles) or (both sides) M2Ig (at 350 nM, black squares). F1Ig 2 effectively reduces *Y. pestis* density at both concentrations tested, whereas F1Ig 8 has the same effect only at the higher concentration. (**B**) Lower respiratory human small airway epithelial cells (HSAEC) were incubated alone (upper left), with *Y. pestis* (upper right)*,* with *Y. pestis* plus F1Ig 2 (180 nM, lower left), or with *Y. pestis* plus F1Ig 8 (180 nM, lower right) for 18 hours. Optical imaging shows that *Y. pestis* agglutinate in the presence of both F1IgGs, which might explain the cell density drop seen in **A**.

**Figure S8. Effect of IgGs on epithelial cells.** Lower Respiratory Human Small Airway Epithelial Cell (HSAEC) were assessed for cell damage (Lactate Dehydrogenase, LDH, release, top) and cell metabolism/viability (metabolization of Water-Soluble Tetrazolium salt, WST, bottom) in the absence of antibodies (grey) or the presence of F1Ig 2 (red), F1Ig 8 (blue), or aM2Ig (black). Neither of the antibodies have a cytotoxic effect on HSAECs.

**Figure S9. Mass spectrometry characterization of free and labelled antibodies.**  MALDI-MS spectra of intact (**A**) and DTPA-conjugated (**B**) antibodies. The lowest mass peaks correspond to the +1 charged proteins. The additional higher mass main peaks correspond to protein with more than 1 positive charge (up to +5).


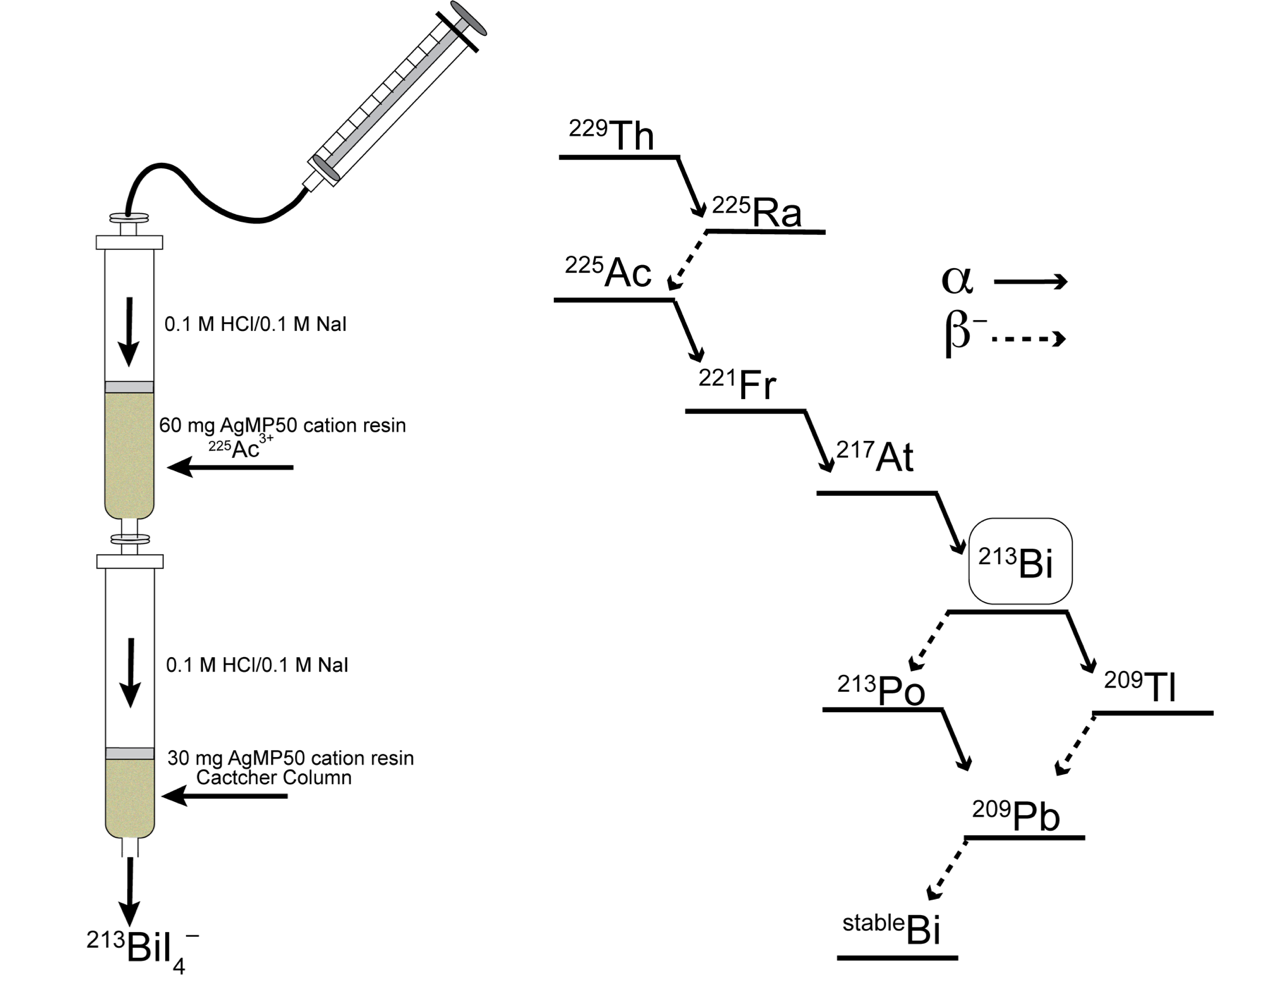


**Figure S10.** 213Bi generator setup (left) with AG MP50 cation resin to retain 225Ac that was isolated from the decay of the parent 229Th isotope (right). 213Bi, as the BiI4– anion, can be eluted daily from the generator by flowing a solution containing 0.1 M HCl/0.1 M NaI through.

**Figure S11. Comparison of aF1Ig 2 and 8 to aF1 m252.** (**A**)Identity and homology of variable regions (VL and VH) and single complementarity determining regions (CDRs) sequences of aFIg 2 and 8 compared to aF1 m252. (**B**) Alignment of aF1 m252 with aFIg 2 (top) and aFIg 8 (bottom). The different color frames enclose the various CDR sequences. The color of the frames matches the colors used to write the CDRs in **A**, and serve to identify the specific CDRs (e.g. **CDRL1** corresponds to the sequence framed in orange).
